# Supplementary material for: Structurally colored polymer films with narrow stop band, high angle-dependence and good mechanical robustness for trademark anti-counterfeiting
Source: Royal Society of Chemistry journal article supplement (doi:10.1039/c8nr04058c), 2018-01-01
Supplement: c8nr04058c1.pdf [file c8nr04058c1.pdf]

# Structurally Colored Polymer Films with Narrow Stop Band, High Angle-Dependence and Good Mechanical Robustness for Trademark Anti-counterfeiting

Zhipeng Meng, Suli Wu\*, Bingtao Tang, Wei Ma and Shufen Zhang

State Key Laboratory of Fine Chemicals, Dalian University of Technology, 2 Linggong Road, Dalian 116024, P.R. China.

Email: [wusuli@dlut.edu.cn](mailto:wusuli@dlut.edu.cn)

Supporting Figures:

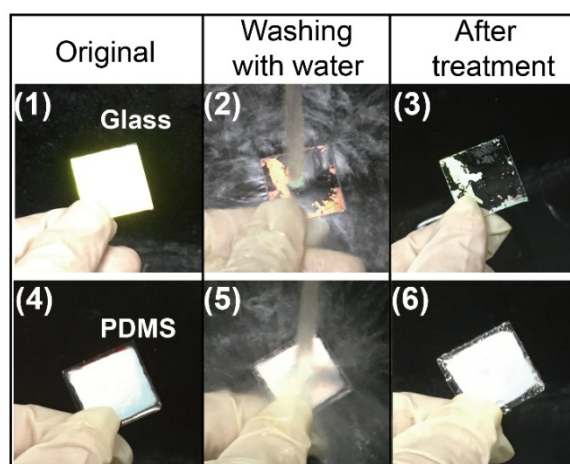

**Fig. S1** Digital images of photonic crystal film on glass and composite photonic crystal film(PDMS/PS) fabricated from 247 nm PS spheres under high speed water washing treatment: before the treatment (1,4) ; during the treatment(2,5); and after the treatment (3,6).

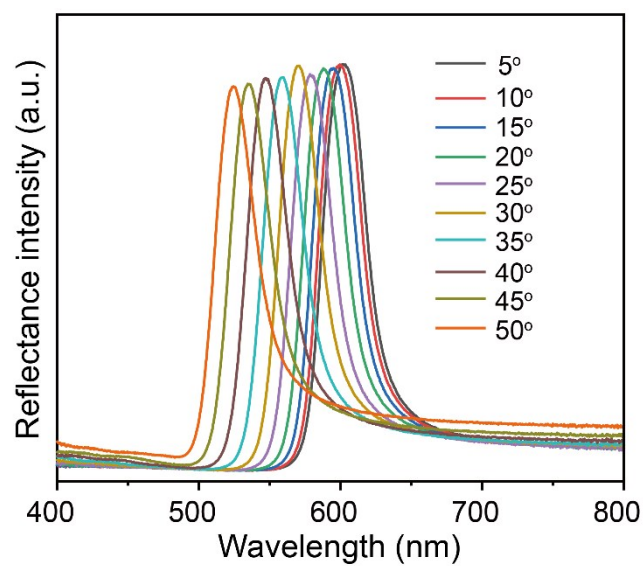

**Fig. S2** Reflectance spectra at different viewing angles of the as-prepared colloidal PCs of PS with diameter of 247 nm assembled on PDMS (PDMS/PS)

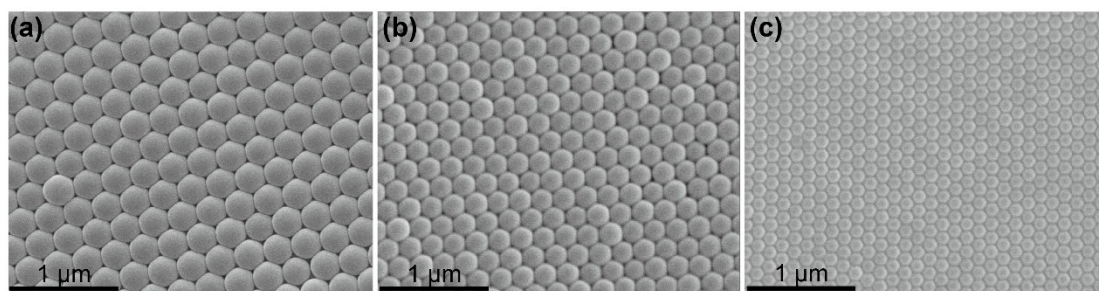

**Fig. S3** SEM of PDMS/PS films with different diameters (a) 274 nm (b) 209 nm (c) 177 nm.

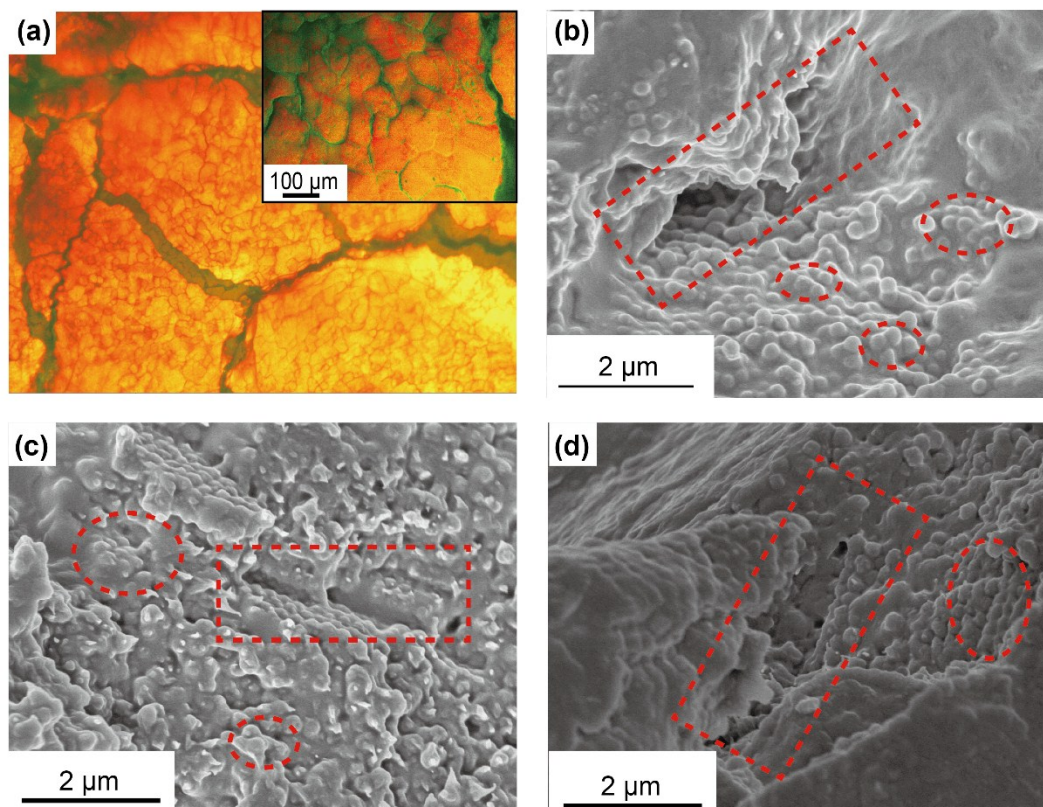

**Fig. S4** (a) Optical microscopy image of the composite film with the strain of 10%. (b-d) The cross section SEM images of the structure of PS PCs in sandwich structure with the strain of 10%.

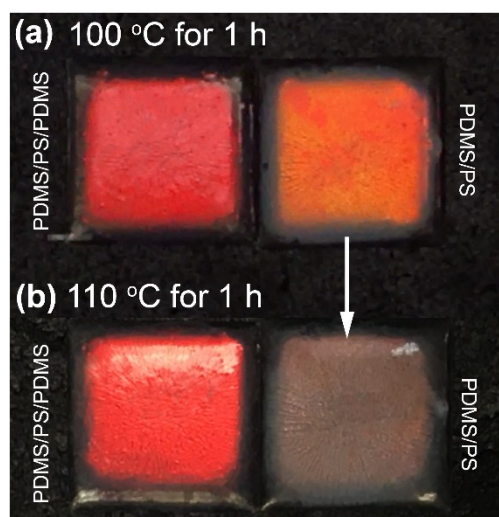

**Fig. S5** (a) Digital images of PDMS/PS/PDMS and PDMS/PS heated at 100 °C for 1h. (b) Digital images of PDMS/PS/PDMS and PDMS/PS heated at 110 °C for 1h.

**Table S1** The FWHM (full width at half-maximum) of different PCs

| PCs film             | FWHM(full width at half-maximum) |
|----------------------|----------------------------------|
| SiO <sub>2</sub> PCs | 47.23 nm                         |
| PMMA PCs             | 42.85 nm                         |
| PS PCs               | 40.10 nm                         |
| PDMS/PS/PDMS         | 19.81 nm                         |
